# Supplementary material for: Zwitterionic choline phosphate conjugated folate-poly (ethylene glycol): a general decoration of erythrocyte membrane-coated nanoparticles for enhanced tumor-targeting drug delivery
Source: Royal Society of Chemistry journal article supplement (doi:10.1039/d1tb02493k), 2021-12-20
Supplement: d1tb02493k1.pdf [file d1tb02493k1.pdf]

## Supplementary Information

Zwitterionic choline phosphate conjugated folate-poly (ethylene glycol):

A general decoration of erythrocyte membranes-coated nanoparticles

for enhanced tumor-targeting drug delivery

Yuyue Zhang,<sup>a</sup> Yuemin Wang,<sup>a</sup> Qiangwei Xin,<sup>a</sup> Mingjing Li,<sup>a</sup> Peng Yu,<sup>a</sup> Jun Luo,<sup>a</sup> Xinyuan Xu,<sup>\*a</sup> Xingyu Chen,<sup>\*ab</sup> and Jianshu Li<sup>a</sup>

<sup>a</sup> College of Polymer Science and Engineering, State Key Laboratory of Polymer Materials Engineering, Sichuan University, Chengdu 610065, P.R. China.

E-mail: xinyuanxu22@scu.edu.cn

<sup>b</sup> College of Medicine, Southwest Jiaotong University, Chengdu, 610003, China

E-mail: chenxy@swjtu.edu.cn

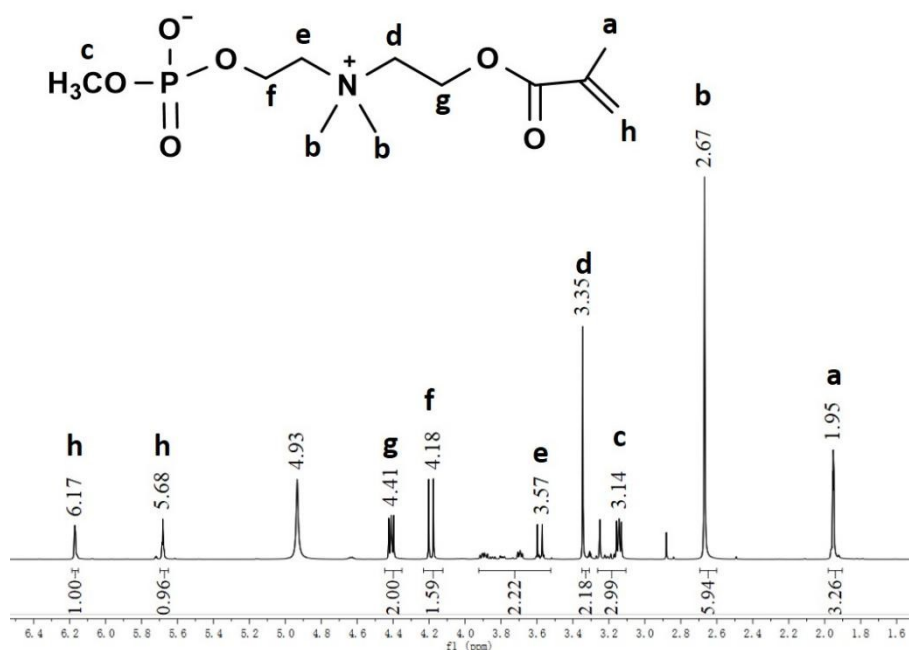

Fig. S1. <sup>1</sup>H NMR spectrum of MCP.

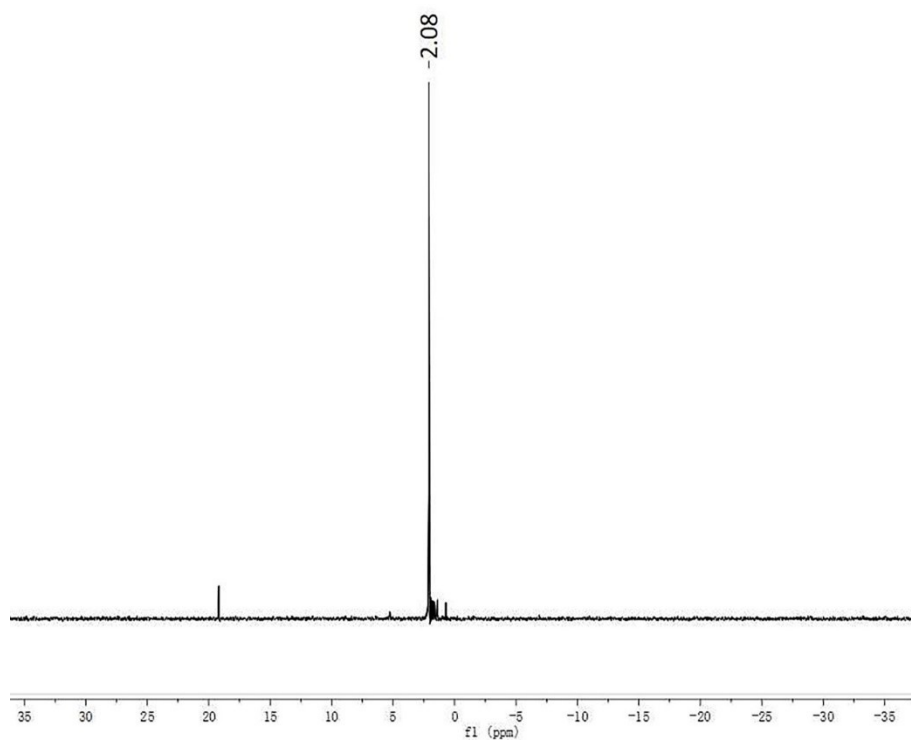

Fig. S2.  $^{31}\text{P}$  NMR spectrum of MCP.

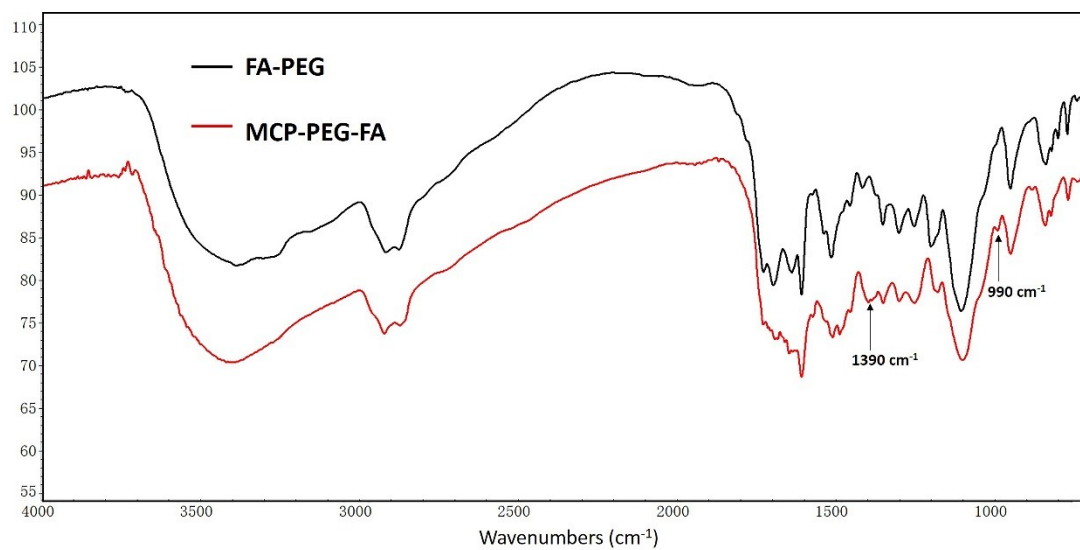

Fig. S3. FT-IR spectra of FA-PEG and MCP-PEG-FA.

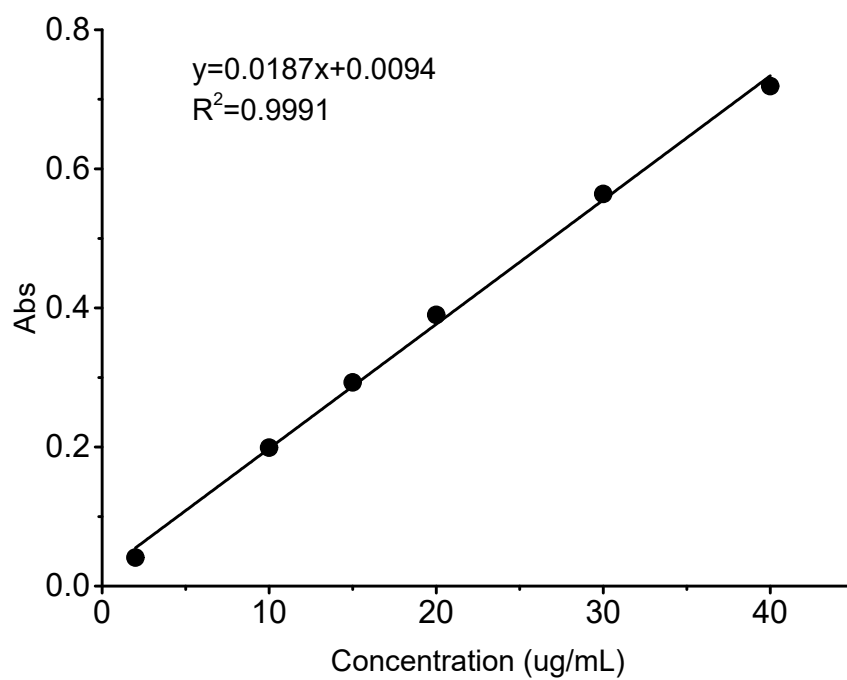

Fig. S4. Corresponding calibration curve of DOX.
